# Supplementary material for: Predictors of Referral to Cardiac Rehabilitation in Patients following Hospitalisation with Heart Failure: A Multivariate Regression Analysis
Source: MDPI journal article supplement (doi:10.3390/jcm11051232), 2022-02-24
Supplement: s1 [file s1]

**Supplementary Table S1: Baseline patient characteristics among all patients and those referred and not referred to cardiac rehabilitation (all data reported)**

| Characteristics                      | All (%)<br>(n = 1281) | CR Referral<br>(%)<br>(n = 125) | No CR<br>Referral (%)<br>(n=1156) | p-value |
|--------------------------------------|-----------------------|---------------------------------|-----------------------------------|---------|
| Age, y                               | 79.7 (70.3-86.3)      | 73.6 (62.7-81.5)                | 80.2 (71.1-86.5)                  | <0.001  |
| Male, n (%)                          | 723 (56.4)            | 90 (72.0)                       | 633 (54.8)                        | < 0.001 |
| BMI, kg/m <sup>2</sup>               | 29.1 (35.8-34.5)      | 29.7 (25.8-34.9)                | 29.0 (24.8-34.5)                  |         |
| <b>HF Subtype</b>                    |                       |                                 |                                   |         |
| HFrEF                                | 420 (32.8)            | 62 (49.6)                       | 358 (31.0)                        | <0.001  |
| HFmrEF                               | 169 (13.2)            | 11 (8.8)                        | 158 (13.7)                        |         |
| HFpEF                                | 434 (33.9)            | 26 (20.8)                       | 408 (35.3)                        |         |
| Unknown                              | 258 (20.1)            | 26 (20.8)                       | 232 (20.1)                        |         |
| LVEF (%)                             | 38.0 (25.6-50.3)      | 30.0 (22.3-39.8)                | 40 (26.0-53.0)                    | 0.004   |
| <b>NYHA</b>                          |                       |                                 |                                   |         |
| Class I / II                         | 20 (4.5) / 236 (53.5) | 2 (0.5) / 37 (68.8)             | 18 (4.7) / 198 (51.4)             |         |
| Class III/ IV                        | 162 (36.7) / 23 (5.2) | 14 (25.9) / 1 (1.9)             | 148 (38.2) / 22 (5.7)             |         |
| Unknown                              | 840 (65.6)            | 71 (56.8)                       | 770 (66.7)                        |         |
| <b>Admission Speciality, n (%)</b>   |                       |                                 |                                   |         |
| HF Unit                              | 126 (9.8)             | 18 (14.5)                       | 108 (9.3)                         | 0.001   |
| Cardiology                           | 434 (33.9)            | 58 (46.8)                       | 376 (32.5)                        |         |
| Gerontology                          | 36 (2.8)              | 5 (4.0)                         | 31 (2.7)                          |         |
| General Medicine                     | 622 (48.6)            | 39 (31.5)                       | 583 (50.4)                        |         |
| Other                                | 62 (4.8)              | 4 (3.2)                         | 58 (5.0)                          |         |
| <b>Cardiovascular History, n (%)</b> |                       |                                 |                                   |         |
| History of HF                        | 968 (75.5)            | 93 (74)                         | 874 (75.6)                        |         |
| Previous hospitalisation for HF      | 774 (60.4)            | 75 (60.0)                       | 698 (60.4)                        |         |
| Cerebrovascular disease              | 242 (18.9)            | 27 (21.6)                       | 215 (18.6)                        |         |
| Hypertension                         | 977 (76.2)            | 85 (68.0)                       | 891 (77.1)                        | 0.02    |
| History of angina                    | 481 (37.5)            | 43 (34.4)                       | 437 (37.8)                        |         |
| History of PCI or CABG               | 393 (30.7)            | 37 (29.6)                       | 356 (30.8)                        |         |
| History of MI                        | 394 (30.7)            | 40 (32)                         | 353 (30.5)                        |         |
| Arrhythmia                           | 695 (54.2)            | 66 (52.8)                       | 628 (54.3)                        |         |
| CIED therapy                         | 284 (22.2)            | 29 (23.2)                       | 255 (22.1)                        | 0.004   |
| Smoking Status                       |                       |                                 |                                   |         |
| <i>Current smoker</i>                | 133 (12.4)            | 18 (16.5)                       | 115 (11.9)                        |         |
| <i>Ex-smoker</i>                     | 504 (46.8)            | 51 (46.8)                       | 451 (46.8)                        |         |
| <b>Heart failure aetiology</b>       |                       |                                 |                                   |         |
| Ischaemic related cardiomyopathy     | 458 (35.8)            | 62 (49.6)                       | 396 (34.3)                        | 0.001   |
| Idiopathic Cardiomyopathy            | 140 (10.9)            | 20 (16)                         | 120 (10.4)                        |         |
| Hypertension                         | 223 (17.4)            | 16 (12.8)                       | 207 (17.9)                        |         |

|                                                    |                 |               |               |       |
|----------------------------------------------------|-----------------|---------------|---------------|-------|
| Infiltrative Cardiomyopathy                        | 10 (0.8)        | 1 (0.8)       | 9 (0.8)       |       |
| Hypertrophic Cardiomyopathy                        | 43 (3.4)        | 3 (2.4)       | 40 (3.5)      |       |
| Valvular                                           | 179 (14.0)      | 12 (9.6)      | 137 (14.4)    |       |
| Arrhythmia related                                 | 187 (14.6)      | 26 (20.8)     | 161 (13.9)    | 0.04  |
| <b>Non-Cardiovascular Medical History, n (%)</b>   |                 |               |               |       |
| Diabetes                                           | 552 (43.1)      | 56 (44.8)     | 496 (42.9)    |       |
| Dementia                                           | 100 (7.8)       | 4 (3.2)       | 96 (8.3)      | 0.04  |
| Depression                                         | 251 (19.6)      | 20 (16.0)     | 231 (20.0)    |       |
| Current malignancy                                 | 88 (6.9)        | 7 (5.6)       | 81 (7.0)      |       |
| COPD / Asthma                                      | 394 (30.8)      | 23 (18.4)     | 371 (32.1)    | 0.002 |
| Obstructive sleep apnoea                           | 187 (14.6)      | 17 (13.6)     | 170 (14.7)    |       |
| Chronic kidney disease                             |                 |               |               |       |
| <i>Mild</i>                                        | 241 (18.8)      | 22 (17.6)     | 217 (19.0)    | 0.002 |
| <i>Moderate</i>                                    | 408 (31.9)      | 28 (22.4)     | 380 (32.9)    |       |
| <i>Severe</i>                                      | 159 (12.4)      | 10 (8.0)      | 149 (12.9)    |       |
| Liver disease                                      |                 |               |               |       |
| <i>Mild</i>                                        | 52 (4.1)        | 4 (3.2)       | 48 (4.2)      | 0.04  |
| <i>Moderate or Severe</i>                          | 30 (2.3)        | 4 (3.2)       | 26 (2.3)      |       |
| Iron deficiency                                    | 253 (20)        | 16 (12.9)     | 237 (20.8)    |       |
| Anaemia                                            | 394 (30.8)      | 23 (18.4)     | 371 (32.1)    | 0.002 |
| <b>Treatments received during admission, n (%)</b> |                 |               |               |       |
| IV diuretics                                       | 1096 (85.8)     | 102 (82.9)    | 994 (86.1)    |       |
| IV GTN infusion                                    | 48 (3.8)        | 7 (5.7)       | 41 (3.5)      |       |
| IV inotrope infusion                               | 62 (4.8)        | 10 (8.1)      | 52 (4.5)      |       |
| Oral Diuretics                                     | 1161 (90.9)     | 108 (88.5)    | 1053 (91.2)   |       |
| Oxygen therapy                                     | 837 (65.6)      | 65 (53.3)     | 772 (66.9)    | 0.003 |
| CPAP / BiPAP                                       | 174 (13.6)      | 13 (10.6)     | 161 (14.0)    |       |
| IABP/ ECMO                                         | 6 (0.5)         | 1 (0.8)       | 5 (0.4)       |       |
| Invasive mechanical ventilation                    | 25 (2.0)        | 5 (4.0)       | 20 (1.7)      |       |
| Angiography                                        | 112 (8.8)       | 19 (15.3)     | 93 (8.1)      | 0.01  |
| PCI                                                | 15 (1.2)        | 5 (4.0)       | 10 (0.9)      | 0.002 |
| CABG                                               | 9 (0.7)         | 1 (0.8)       | 8 (0.7)       |       |
| Dialysis                                           | 12 (0.9)        | 1 (0.8)       | 11 (1.0)      |       |
| LVAD                                               | 1 (0.1)         | 1 (0.8)       | 00 (0.0)      |       |
| Valve procedure                                    | 7 (0.5)         | 1 (0.8)       | 6 (0.5)       |       |
| CIED Therapy                                       |                 |               |               |       |
| <i>Pacemaker</i>                                   | 28 (2.2)        | 3 (2.4)       | 25 (2.2)      | 0.002 |
| <i>CRT-P</i>                                       | 2 (0.2)         | 0 (0.0)       | 2 (0.2)       |       |
| <i>ICD</i>                                         | 15 (1.2)        | 5 (4.1)       | 10 (0.9)      |       |
| <i>CRT-D</i>                                       | 18 (1.4)        | 13 (1.1)      | 5 (4.1)       |       |
| <b>Resting Haemodynamics on d/c</b>                |                 |               |               |       |
| Systolic BP (mmHg)                                 | 120 (110.0-135) | 118 (110-130) | 120 (110-135) | 0.02  |
| Diastolic BP (mmHg)                                | 68 (60-75)      | 68 (60-75)    | 68 (60-75)    |       |
| HR (bpm)                                           | 74.0 (65-83)    | 75.0 (65-85)  | 74 (65-82)    |       |
| <b>Heart Failure pharmacotherapy,</b>              |                 |               |               |       |

| <b>n (%)</b>               |               |            |             |       |
|----------------------------|---------------|------------|-------------|-------|
| ACE Inhibitor              | 534 (41.8)    | 54 (43.2)  | 480 (41.6)  |       |
| ARB                        | 219 (17.1)    | 24 (19.4)  | 195 (16.9)  |       |
| Beta blocker               | 910 (71.2)    | 98 (79.0)  | 812 (70.4)  | 0.04  |
| Aldosterone antagonist     | 474 (37.1)    | 48 (38.7)  | 426 (36.9)  |       |
| Digitalis                  | 210 (16.4)    | 15 (12.1)  | 195 (16.9)  |       |
| Antiarrhythmic             | 141 (11.0)    | 18 (14.5)  | 123 (10.7)  |       |
| Nitrate                    | 217 (17.0)    | 17 (13.7)  | 200 (17.3)  |       |
| Loop diuretic              | 1207 (94.2)   | 118 (94.4) | 1089 (94.2) |       |
| Other vasodilator          | 62 (4.9)      | 3 (2.4)    | 59 (5.1)    |       |
| Ivabradine                 | 45 (3.5)      | 6 (4.8)    | 39 (3.4)    |       |
| Lipid lowering agent       | 715 (55.9)    | 73 (58.4)  | 642 (55.6)  |       |
| Antiplatelet               | 674 (52.7)    | 60 (48.0)  | 614 (53.2)  |       |
| Anticoagulant              | 586 (45.8)    | 69 (55.6)  | 517 (44.8)  | 0.02  |
| Thiazide diuretic          | 140 (11.0)    | 11 (8.9)   | 129 (11.2)  |       |
| Calcium channel antagonist | 209 (16.4)    | 21 (16.9)  | 188 (16.3)  |       |
| Total Meds on d/c (SEM)    | 10.0 (8.0-13) | 9 (8-11)   | 10 (8-13)   | 0.047 |

Data expressed as median and percentiles (25-75%) for continuous variables and count and proportions (%) for categorical variables.

‡ Variables where missing data >15%.

‡where factor has more than one level, p-value applies to the overall association of this factor with the outcome.

BMI, body mass index; HFrEF, heart failure with reduced ejection fraction; HFmrEF, heart failure with mid-range ejection fraction; HFpEF, heart failure with preserved ejection fraction; LVEF, left ventricular ejection fraction; HF, heart failure; PCI, percutaneous coronary intervention; CABG, coronary artery bypass graft; MI, myocardial infarction; CIED, Cardiac Implantable Electronic Device; COPD, chronic obstructive pulmonary disease; IV, intravenous; GTN, Glyceryl trinitrate; Cardiac Implantable Electronic Device; CPAP, continuous positive airway pressure; BiPAP, bilevel positive airway pressure, IABP, intra-aortic balloon pump; ECMO, extracorporeal membrane oxygenation; LVAD, left ventricular assist device; CRT-p, cardiac resynchronisation therapy – pacemaker; ICD, implantable cardioverter defibrillator; CRT-D, cardiac resynchronisation therapy – defibrillator; BP, blood pressure; HR, heart rate; ACE, angiotensin converting enzyme; ARB, aldosterone receptor blocker
